# Supplementary material for: Insights on In-Situ Photochemistry Associated with Ozone Reduction in Guangzhou during the COVID-19 Lockdown
Source: MDPI journal article supplement (doi:10.3390/atmos13020212), 2022-01-28
Supplement: s1 [file s1]

# Supplementary Materials: Insights on in-situ photochemistry associated with ozone reduction in Guangzhou during the COVID-19 lockdown

Kit Ying Shek <sup>1</sup>, Yangzong Zeren <sup>1</sup>, Hai Guo <sup>1</sup>, Mei Li <sup>2,3,4</sup>, Ming Liu <sup>5</sup>, Bo Huang <sup>5</sup> and Xiaopu Lyu <sup>1,\*</sup>

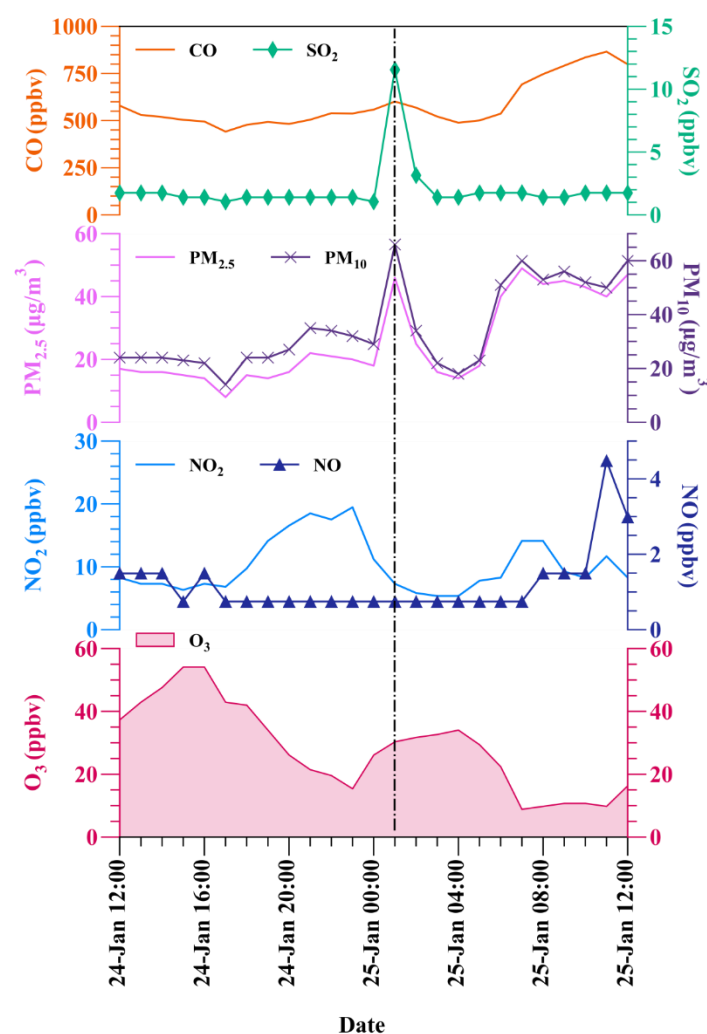

**Figure S1.** Variations of criteria air pollutants and NO from 12:00 on 24 January to 12:00 on 25 January.

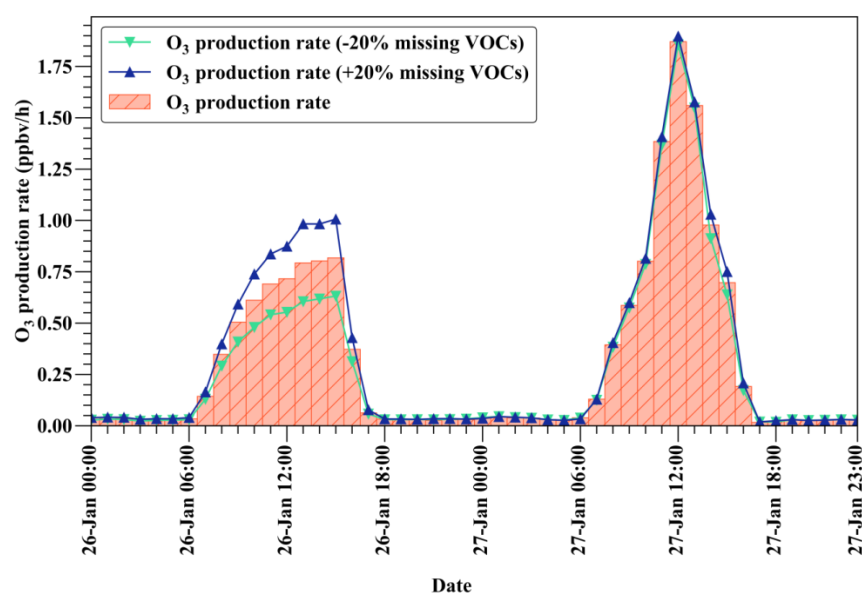

**Figure S2.** Responses of the simulated  $O_3$  production rate to  $\pm 20\%$  changes in the estimated mixing ratios of VOCs on 26 and 27 January 2020.

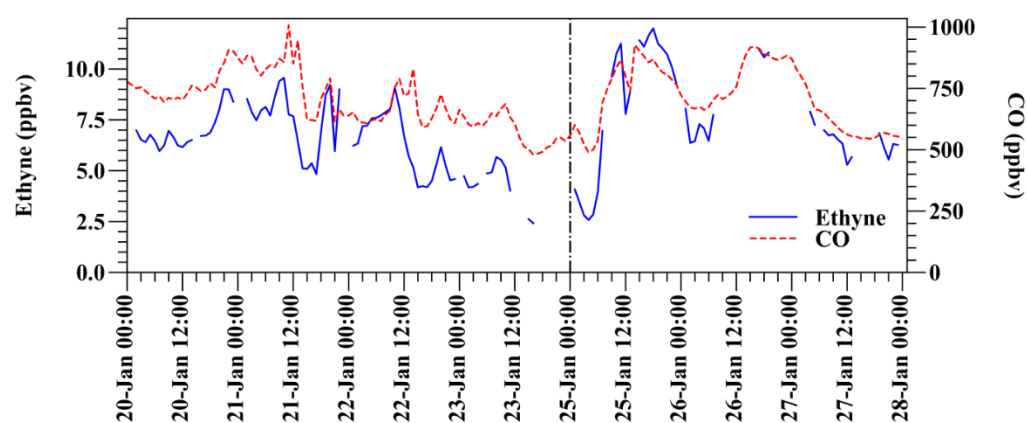

**Figure S3.** Time series of CO and ethyne in the shorter study period (transitional week). The dashed line separates the Pre-LD and LD periods.

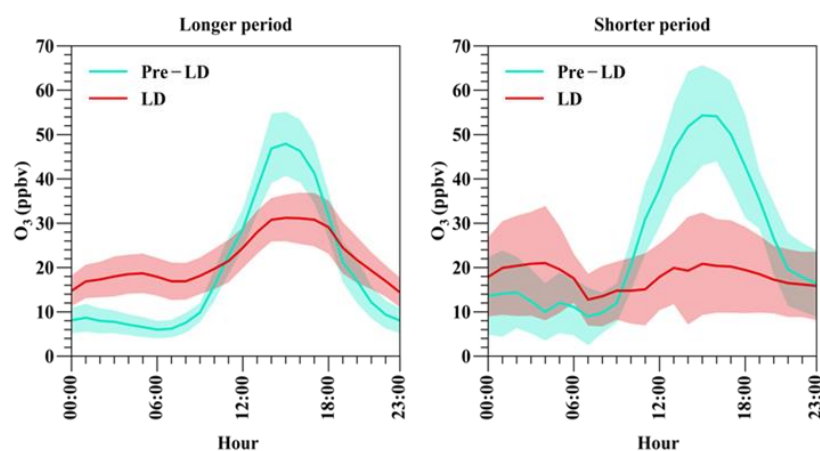

**Figure S4.** Average diurnal profiles of  $O_3$  during the Pre-LD and LD in the longer (left panel) and shorter study period (right panel).

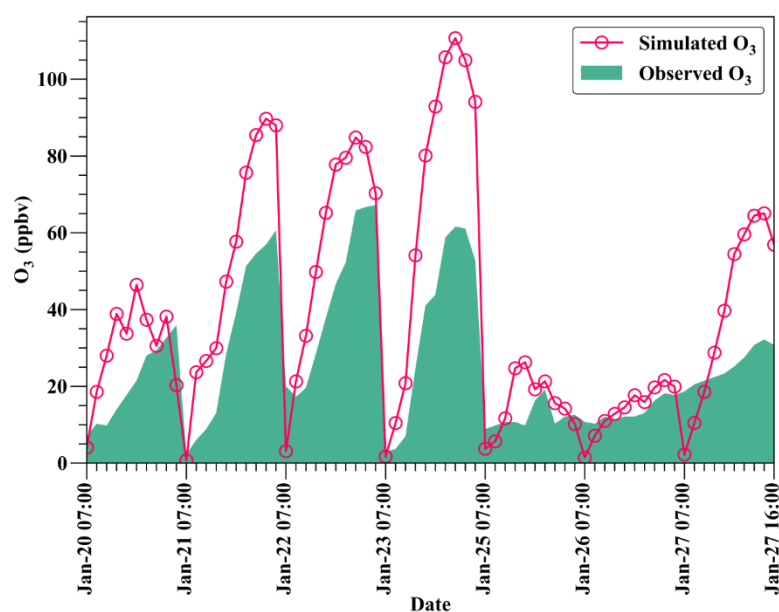

**Figure S5.** Time series of the simulated and observed O<sub>3</sub> between 7:00 and 16:00 on 20–27 January excluding 24 January.

**Table S1.** VOCs, OVOCs and trace gases that are input into the PBM-MCM model.

| No. | Name                   | No. | Name                            |
|-----|------------------------|-----|---------------------------------|
| 1   | Ethane                 | 27  | <i>trans</i> -2-Pentene         |
| 2   | Propane                | 28  | Isoprene                        |
| 3   | <i>i</i> -Butane       | 29  | 1-Hexene                        |
| 4   | <i>n</i> -Butane       | 30  | Benzene                         |
| 5   | <i>i</i> -Pentane      | 31  | Toluene                         |
| 6   | 2,2-Dimethylbutane     | 32  | Ethylbenzene                    |
| 7   | 2,3-Dimethylbutane     | 33  | <i>m/p</i> -Xylene              |
| 8   | 2-Methylpentane        | 34  | <i>o</i> -Xylene                |
| 9   | 3-Methylpentane        | 35  | Styrene                         |
| 10  | <i>n</i> -Hexane       | 36  | <i>n</i> -Propylbenzene         |
| 11  | 2-Methylhexane         | 37  | 3-Ethyltoluene                  |
| 12  | Cyclohexane            | 38  | 4-Ethyltoluene                  |
| 13  | 3-Methylhexane         | 39  | 1,3,5-Trimethylbenzene          |
| 14  | <i>n</i> -Heptane      | 40  | 2-Ethyltoluene                  |
| 15  | <i>n</i> -Octane       | 41  | 1,2,4-Trimethylbenzene          |
| 16  | <i>n</i> -Decane       | 42  | 1,2,3-Trimethylbenzene          |
| 17  | <i>n</i> -Hendecane    | 43  | Chloromethane                   |
| 18  | Dodecane               | 44  | 1,1,1-Trichloroethane           |
| 19  | Ethene                 | 45  | Trichloroethylene               |
| 20  | Propene                | 46* | Acetone                         |
| 21  | Ethyne                 | 47* | Methyl <i>tert</i> -butyl ether |
| 22  | <i>trans</i> -2-Butene | 48# | CO                              |
| 23  | <i>cis</i> -2-Butene   | 49# | SO <sub>2</sub>                 |
| 24  | 1-Butene               | 50# | NO <sub>2</sub>                 |
| 25  | 1,3-Butadiene          | 51# | NO                              |
| 26  | 1-Pentene              | 52# | O <sub>3</sub>                  |

\* OVOC species; # Trace gases.

**Table S2.** O<sub>3</sub> production and destruction pathways included in calculation of net O<sub>3</sub> production rate.

| O <sub>3</sub> production pathways | O <sub>3</sub> destruction pathways |
|------------------------------------|-------------------------------------|
| HO <sub>2</sub> + NO               | OH + NO <sub>2</sub>                |
| RO <sub>2</sub> + NO               | O <sub>3</sub> + Alkenes            |
|                                    | O <sup>1</sup> D + H <sub>2</sub> O |

|  |                                  |
|--|----------------------------------|
|  | O <sub>3</sub> + OH              |
|  | O <sub>3</sub> + HO <sub>2</sub> |

**Table S3.** Coefficients of determination for the correlations between CO and some VOC species during the Pre-LD and LD in the shorter study period.

| VOC species        | Coefficient of determination (r <sup>2</sup> ) |                  |
|--------------------|------------------------------------------------|------------------|
|                    | Pre-LD                                         | LD               |
| Ethane             | 0.25 (n = 78 #)***                             | 0.74 (n = 48)*** |
| Propane            | 0.16 (n = 78)***                               | 0.50 (n = 48)*** |
| Ethene             | 0.27 (n = 78)***                               | 0.73 (n = 48)*** |
| Ethyne             | 0.50 (n = 78)***                               | 0.89 (n = 48)*** |
| Benzene            | 0.10 (n = 59)*                                 | 0.53 (n = 45)*** |
| 1,2-Dichloroethane | 0.22 (n = 30)**                                | 0.37 (n = 44)*** |

# Number of data points; \* P-value < 0.05; \*\* P-value < 0.01; \*\*\* P-value < 0.001.

**Table S4.** Percentage changes of VOCs between the Pre-LD and LD periods and the P-values.

| VOC species                    | Percentage change (%) | P-value (two-tailed t-test) |
|--------------------------------|-----------------------|-----------------------------|
| Ethane                         | −1.90                 | 0.65                        |
| Propane                        | −34.9                 | <0.001                      |
| <i>i</i> -Butane               | −55.2                 | <0.001                      |
| <i>n</i> -Butane               | −45.7                 | <0.001                      |
| <i>i</i> -Pentane              | −11.0                 | 0.43                        |
| 2,3-Dimethylbutane             | −2.32                 | 0.81                        |
| 3-Methylpentane                | −10.6                 | 0.21                        |
| Methylcyclohexane              | −41.1                 | <0.001                      |
| Dodecane                       | −25.2                 | 0.11                        |
| Ethene                         | −15.9                 | 0.06                        |
| Propene                        | −59.4                 | <0.01                       |
| <i>trans</i> -2-Butene         | −49.8                 | 0.08                        |
| 1,3-Butadiene                  | −9.52                 | 0.15                        |
| 1-Pentene                      | −50.1                 | <0.01                       |
| Ethyne                         | 21.9                  | <0.001                      |
| Benzene                        | −6.64                 | 0.60                        |
| Toluene                        | −66.8                 | <0.001                      |
| Ethylbenzene                   | −67.2                 | <0.001                      |
| <i>m/p</i> -Xylene             | −66.9                 | <0.001                      |
| <i>o</i> -Xylene               | −21.6                 | <0.001                      |
| Styrene                        | −8.05                 | <0.05                       |
| Cumene                         | −0.45                 | 0.64                        |
| 4-Ethyltoluene                 | −9.71                 | <0.05                       |
| 1,2,4-Trimethylbenzene         | −9.66                 | <0.05                       |
| 1,3-Dichlorobenzene            | −0.97                 | 0.55                        |
| 1,4-Dichlorobenzene            | −1.27                 | 0.40                        |
| 1,2,3-Trimethylbenzene         | −3.83                 | 0.16                        |
| 1,3-Diethylbenzene             | −9.82                 | 0.57                        |
| 1,2-Dichlorobenzene            | −7.68                 | 0.61                        |
| 1,4-Diethylbenzene             | −0.40                 | 0.94                        |
| Dichlorodifluoromethane        | −0.12                 | 0.99                        |
| Chloromethane                  | −0.21                 | 0.99                        |
| Vinyl chloride                 | −0.04                 | 0.99                        |
| Fluorotrichloromethane         | −10.4                 | <0.01                       |
| 1,1,2-Trichlorotrifluoroethane | −4.01                 | 0.33                        |
| 1,1,1-Trichloroethane          | −3.85                 | 0.07                        |
| Carbon tetrachloride           | −0.15                 | 0.98                        |
| Trichloroethylene              | −52.3                 | <0.001                      |
| Tribromomethane                | −0.12                 | 0.97                        |
| Hexachloro-1,3-butadiene       | −10.9                 | 0.70                        |
| Acetone                        | −15.0                 | 0.21                        |

---

|                                 |       |        |
|---------------------------------|-------|--------|
| Methyl <i>tert</i> -butyl ether | −75.8 | <0.001 |
| Methyl methacrylate             | −6.11 | 0.73   |

---
